# Supplementary material for: A Myosin Light Chain Is Critical for Fungal Growth Robustness in Candida albicans
Source: PubMed Central journal article supplement (PMC8546852; doi:10.1128/mbio.02528-21), 2021-10-05
Supplement: mbio.02528-21-sf003.pdf [file mbio.02528-21-sf003.pdf]

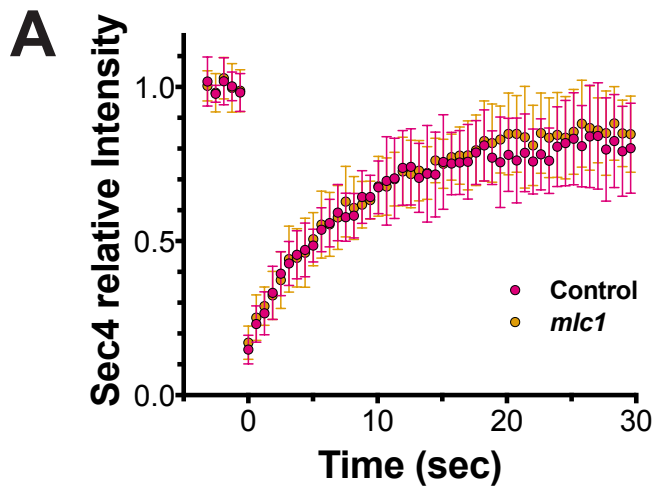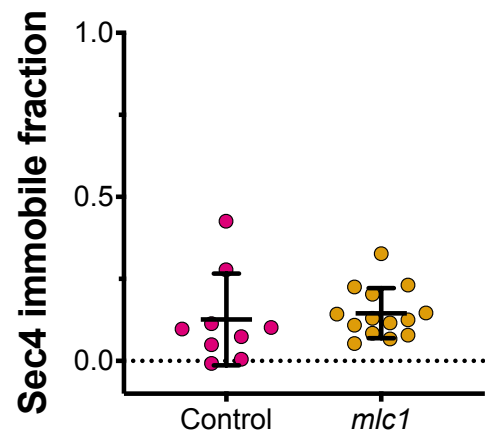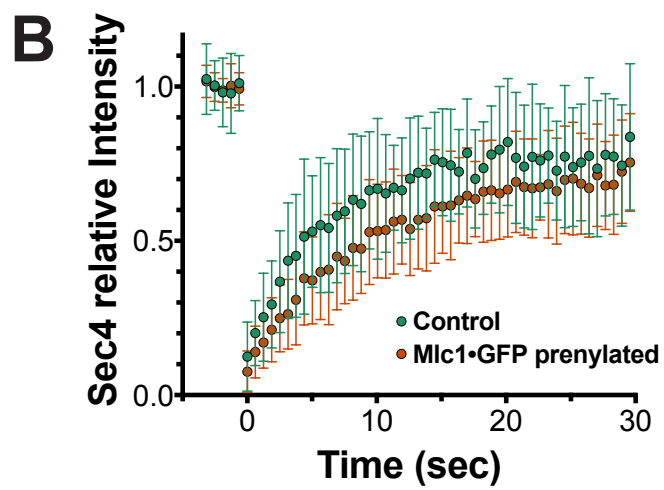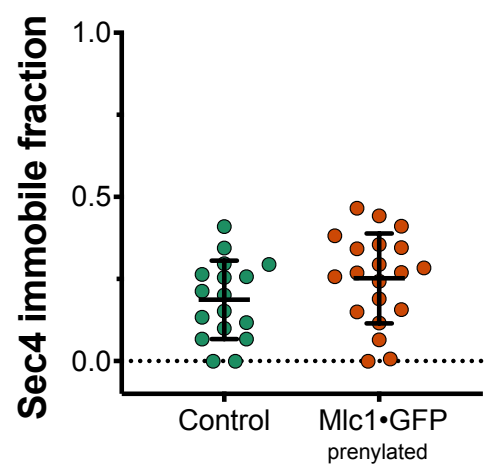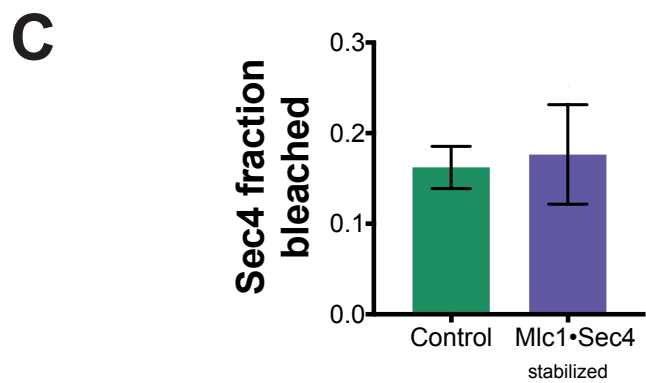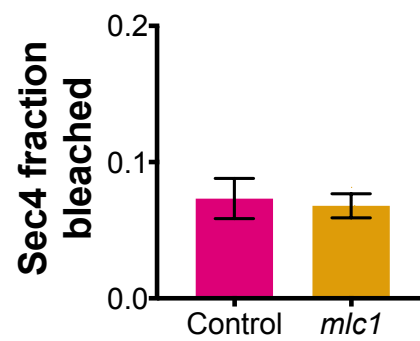

Figure S3
